# Supplementary material for: Insights into the mechanism of oxidation of dihydroorotate to orotate catalysed by human class 2 dihydroorotate dehydrogenase: a QM/MM free energy study
Source: Royal Society of Chemistry journal article supplement (doi:10.1039/c5cp02016f), 2015-01-01
Supplement: c5cp02016f1.pdf [file c5cp02016f1.pdf]

**Insights into the Mechanism of Oxidation of Dihydroorotate  
to Orotate in Human Class 2 Dihydroorotate Dehydrogenase:  
A QM/MM Free Energy Study**

**Cláudio Nahum Alves,<sup>\*a,b</sup> José Rogério A. Silva<sup>a,b</sup> and Adrian E. Roitberg<sup>\*b</sup>**

*<sup>a</sup>Laboratório de Planejamento e Desenvolvimento de Fármacos, Instituto de Ciências Exatas e Naturais, Universidade Federal do Pará, Belém, Brazil. Fax: 55 91-3201-7633; Tel: 55 91-3201-8235; E-mail: nahum@ufpa.br*

*<sup>b</sup>Department of Chemistry, University of Florida, Gainesville, Florida, United States. Fax: 352 392-8722; Tel: 352 392-6972; E-mail: roitberg@ufl.edu*

## Supplementary Information

### 1. Correction of SCC-DFTB/MM by B3LYP(MP2)/MM method

To correct the possible inaccuracies in the SCC-DFTB semiempirical method and verify its reliability with higher theoretical levels (i.e. DFT or MP2). In this sense, we performed out single-point B3LYP-D3/MM and MP2/MM calculations using representative snapshots from MC, INT and TS states, which are the same used on the Interaction Energy Decomposition analysis. The corrected SCC-DFTB/MM results based on the B3LYP-D3/MM and MP2/MM calculations improve not only the QM level as well as the MM interactions and its polarization on the QM subsystem<sup>1</sup>. The SCC-DFTB correction was performed using a straightforward one-step free energy perturbation,

$$\Delta G_{\text{B3LYP(MP2)-DFTB}} = -kT \ln \langle e^{-\beta(E_{\text{B3LYP(MP2)/MM}} - E_{\text{DFTB/MM}})} \rangle_{\text{DFTB/MM}}$$

which was done at both MC and INT (and P) states to correct the  $\Delta G^\circ$  for the deprotonation and hydride equivalent steps, respectively. Besides, the  $\Delta G^\ddagger$  was corrected for the hydride equivalent step, using INT and P states. The difference between the perturbative corrections at these states gives the B3LYP-D3/MM and MP2/MM corrections to the free energy of the oxidation reaction catalyzed by human DHOD. The B3LYP(MP2)/6-31G\* was applied in order to perform the corrections. The  $\Delta G^\circ$  obtained by SCC-DFTB/MM method for the deprotonation and hydride equivalent steps is estimated at  $-6.54$  and  $-13.50$  kcal·mol<sup>-1</sup>, respectively. Whereas the  $\Delta G^\circ$  calculated by B3LYP-D3/MM is  $-14.75$  and  $-15.15$  kcal·mol<sup>-1</sup>, respectively; and the  $\Delta G^\circ$  calculated by MP2/MM is  $-15.78$  and  $-17.18$  kcal·mol<sup>-1</sup>, respectively. The  $\Delta G^\ddagger$  obtained by SCC-DFTB/MM method for the hydride equivalent step is  $2.04$  kcal·mol<sup>-1</sup>, and the  $\Delta G^\ddagger$  calculated by B3LYP-D3/MM and MP2/MM are  $10.84$  and  $7.55$  kcal·mol<sup>-1</sup>, respectively. The corrected calculations show the qualitative reliability of the semiempirical method (SCC-DFTB) to the high hamiltonian (B3LYP-D3 or MP2). Besides, the same approach was successfully applied to elucidate the catalytic mechanism for the DHOD from *L. lactis*<sup>2</sup>.

1. D. Riccardi, P. Schaefer and Q. Cui, *Journal of Physical Chemistry B*, 2005, 109, 17715-17733.
2. J. R. A. Silva, A. E. Roitberg and C. N. Alves, *Journal of Physical Chemistry B*, 2015, 119, 1468–1473.
